# Supplementary material for: Middle age self-report risk score predicts cognitive functioning and dementia in 20–40 years
Source: PubMed Central journal article supplement — Alzheimers Dement (Amst). 2016 Sep 14;4:118–25. doi: 10.1016/j.dadm.2016.08.003 (PMC5061466; doi:10.1016/j.dadm.2016.08.003), 2016-09-14
Supplement: mmc1.pdf [file mmc1.pdf]

**Middle age self-report risk score predicts cognitive functioning and dementia  
in 20 – 40 years**

Eero Vuoksima, Juha O. Rinne, Noora Lindgren, Kauko Heikkilä, Markku Koskenvuo & Jaakko Kaprio

**Supplementary Tables 1-6**

Supplementary Table 1. The prevalence (N in parentheses) of non-independency/independency in daily activities by cognitive status in old age (>65 years).

|                                                       | No         | Yes, but I need help | Yes, I do not need any help |
|-------------------------------------------------------|------------|----------------------|-----------------------------|
| <hr/>                                                 |            |                      |                             |
| Are you able to take care of your household? (N=2597) |            |                      |                             |
| Demented                                              | 22.3% (58) | 25.8% (67)           | 51.9% (135)                 |
| MICF or inconsistency between TELE & TICS             | 2.5% (27)  | 11.9% (129)          | 85.6% (929)                 |
| cognitive status                                      |            |                      |                             |
| Normal                                                | 0.8% (8)   | 5.8% (73)            | 93.5% (1171)                |
| <hr/>                                                 |            |                      |                             |
| Are you able to get around outside? (N=2596)          |            |                      |                             |
| Demented                                              | 3.8% (10)  | 16.9% (44)           | 79.2% (206)                 |
| MICF or inconsistency between TELE & TICS             | 1.1% (12)  | 4.7% (51)            | 94.2% (1021)                |
| cognitive status                                      |            |                      |                             |
| Normal                                                | 0.2% (3)   | 2.5% (31)            | 97.3% (1218)                |
| <hr/>                                                 |            |                      |                             |
| Are you able to do shopping? (N=2597)                 |            |                      |                             |
| Demented                                              | 26.2% (68) | 16.2% (42)           | 57.7% (150)                 |
| MICF or inconsistency between TELE & TICS             | 5.6% (61)  | 8.1% (88)            | 86.3% (936)                 |
| cognitive status                                      |            |                      |                             |
| Normal                                                | 1.6% (20)  | 4.3% (54)            | 94.1% (1178)                |
| <hr/>                                                 |            |                      |                             |
| Are you able to dress & undress yourself? (N=2597)    |            |                      |                             |
| Demented                                              | 1.2% (3)   | 6.2% (16)            | 92.7% (241)                 |
| MICF or inconsistency between TELE & TICS             | 0.4% (4)   | 1.8% (20)            | 97.8% (1061)                |
| cognitive status                                      |            |                      |                             |
| Normal                                                | 0.2% (2)   | 1.3% (16)            | 98.6% (1234)                |

Note. MICF = mild impairment in cognitive functioning; TELE = a telephone assessment for dementia; TICS = Telephone Interview for Cognitive Status.

Supplementary Table 2. The prevalence (N in parentheses) of dementia, mild impairment in cognitive functioning (MICF) and normal cognition in old age (>65 years) by middle age cognitive reserve (CR) score category for TELE and TICS.

|             | CR score      |               |               |                |                |                |                |                |                |                |
|-------------|---------------|---------------|---------------|----------------|----------------|----------------|----------------|----------------|----------------|----------------|
|             | 0-12          | 13            | 14            | 15             | 16             | 17             | 18             | 19             | 20             | 21-25          |
| <b>TELE</b> |               |               |               |                |                |                |                |                |                |                |
| Dementia    | 47.8%<br>(97) | 31.5%<br>(41) | 21.5%<br>(34) | 20.3%<br>(57)  | 14.2%<br>(39)  | 12.6%<br>(53)  | 9.1%<br>(19)   | 6.3%<br>(17)   | 3.7%<br>(6)    | 0.6%<br>(1)    |
| MICF        | 28.1%<br>(57) | 29.2%<br>(38) | 37.3%<br>(59) | 27.8%<br>(78)  | 28.7%<br>(79)  | 26.6%<br>(112) | 23.4%<br>(49)  | 20.1%<br>(54)  | 14.3%<br>(23)  | 7.3%<br>(13)   |
| Normal      | 24.1%<br>(49) | 39.2%<br>(51) | 41.1%<br>(65) | 52.0%<br>(146) | 57.1%<br>(157) | 60.8%<br>(256) | 67.5%<br>(141) | 73.5%<br>(197) | 82.0%<br>(132) | 92.1%<br>(164) |
| <b>TICS</b> |               |               |               |                |                |                |                |                |                |                |
| Dementia    | 43.3%<br>(88) | 22.3%<br>(29) | 20.3%<br>(32) | 14.6%<br>(41)  | 10.2%<br>(28)  | 9.0%<br>(38)   | 6.2%<br>(13)   | 2.6%<br>(7)    | 2.5%<br>(4)    | 0%<br>(0)      |
| MICF        | 32.5%<br>(66) | 39.2%<br>(51) | 39.9%<br>(63) | 25.6%<br>(72)  | 27.3%<br>(75)  | 23.8%<br>(100) | 22.0%<br>(46)  | 18.3%<br>(49)  | 7.5%<br>(12)   | 3.4%<br>(6)    |
| Normal      | 24.1%<br>(49) | 38.5%<br>(50) | 39.9%<br>(63) | 59.8%<br>(168) | 62.5%<br>(172) | 67.2%<br>(283) | 71.8%<br>(150) | 79.1%<br>(212) | 90.1%<br>(145) | 96.6%<br>(172) |

Note. TELE = a telephone assessment for dementia; TICS = Telephone Interview for Cognitive Status.

Supplementary Table 3. The prevalence (N in parentheses) of dementia in old age (>65 years) by middle age cognitive reserve (CR) score category in those with six years of education.

|             | CR score      |                 |                 |                 |                 |                 |                 |    |    |       |
|-------------|---------------|-----------------|-----------------|-----------------|-----------------|-----------------|-----------------|----|----|-------|
|             | 0-12          | 13              | 14              | 15              | 16              | 17              | 18              | 19 | 20 | 21-25 |
| Dementia    | 36.2%<br>(50) | 18.4%<br>(21)   | 15.2%<br>(22)   | 9.8%<br>(21)    | 9.1%<br>(19)    | 7.5%<br>(22)    | 1.25%<br>(1)    | -  | -  | -     |
| No dementia | 63.8%<br>(88) | 81.6%<br>(93)   | 84.8%<br>(123)  | 90.2%<br>(194)  | 90.9%<br>(190)  | 92.5%<br>(273)  | 98.75%<br>(79)  | -  | -  | -     |
| Total       | 138           | 114             | 145             | 215             | 209             | 295             | 80              | -  | -  | -     |
| OR          | 1.00<br>(REF) | 0.399           | 0.323           | 0.193           | 0.183           | 0.144           | 0.022           | -  | -  | -     |
| 95% CI      |               | 0.220;<br>0.724 | 0.181;<br>0.575 | 0.109;<br>0.342 | 0.101;<br>0.332 | 0.083;<br>0.252 | 0.003;<br>0.166 |    |    |       |

Note. Cases with dementia were categorized as demented by both TELE and TICS instruments; all others are considered as non-demented. OR = Odds ratio, 95%CI = 95% confidence intervals.

TELE = a telephone assessment for dementia, TICS = Telephone Interview for Cognitive Status.

REF = reference category for logistic model.

Supplementary Table 4. The prevalence (N in parentheses) of dementia in old age (>65 years) by dichotomic (0-11 vs. 12-19) middle age cognitive reserve (CR) score for different age groups. Prevalence of dementia by eight groups and c-statistics can be found in Supplementary Table 5.

|                            | CR score<br>0 – 11 | CR score<br>12 – 19 | Total          |
|----------------------------|--------------------|---------------------|----------------|
| <b>Age ≥ 60 years</b>      |                    |                     |                |
| Dementia                   | 60.7%<br>(34)      | 8.3%<br>(1)         | 51.5%<br>(35)  |
| No Dementia                | 39.3%<br>(22)      | 91.7%<br>(11)       | 48.5%<br>(33)  |
| <b>Age ≥ 54 – 59 years</b> |                    |                     |                |
| Dementia                   | 23.5%<br>(32)      | 13.7%<br>(14)       | 19.3 %<br>(46) |
| No Dementia                | 76.5%<br>(104)     | 86.3%<br>(88)       | 80.7%<br>(192) |
| <b>Age ≥ 47 – 53 years</b> |                    |                     |                |
| Dementia                   | 14.2%<br>(47)      | 4.7%<br>(12)        | 10.0%<br>(59)  |
| No Dementia                | 85.8%<br>(285)     | 95.3%<br>(246)      | 90.0%<br>(531) |
| <b>Age ≥ 40 – 46 years</b> |                    |                     |                |
| Dementia                   | 9.3%<br>(42)       | 3.2%<br>(19)        | 5.8%<br>(61)   |
| No Dementia                | 90.7%<br>(411)     | 96.8%<br>(575)      | 94.2%<br>(986) |
| <b>Age &lt; 40 years</b>   |                    |                     |                |
| Dementia                   | 8.1%<br>(12)       | 0.5%<br>(1)         | 3.8%<br>(13)   |
| No Dementia                | 91.9%<br>(137)     | 99.5%<br>(191)      | 96.2%<br>(328) |

Note. Cases with dementia were categorized as demented according to both TELE and TICS instruments; all others are considered as non-demented. TELE = a telephone assessment for dementia, TICS = Telephone Interview for Cognitive Status.

Supplementary Table 5. The prevalence (N in parentheses) of dementia in old age (>65 years) by middle age cognitive reserve (CR) score for different age groups. Area under curve (AUC) is reported for each age group (95% confidence intervals in parentheses).

|                | CR score                                                 |                |                |                |                |               |               |               |
|----------------|----------------------------------------------------------|----------------|----------------|----------------|----------------|---------------|---------------|---------------|
|                | 0 – 9                                                    | 10             | 11             | 12             | 13             | 14            | 15            | 16 – 19       |
|                | Age ≥ 60 years; N=68; AUC = 0.740 (0.630 - 0.850)        |                |                |                |                |               |               |               |
| Dementia       | 71.4 %<br>(25)                                           | 36.4 %<br>(4)  | 50.0%<br>(5)   | 20.0 %<br>(1)  | 0 %<br>(0)     | 0 %<br>(0)    | 0 %<br>(0)    | 0 %<br>(0)    |
| No<br>Dementia | 28.6 %<br>(10)                                           | 63.6 %<br>(7)  | 50.0%<br>(5)   | 80.0 %<br>(4)  | 100 %<br>(3)   | 100 %<br>(1)  | 100 %<br>(2)  | 100 %<br>(1)  |
|                | Age ≥ 54 – 59 years; N=238; AUC = 0.605 (0.521 - 0.689)  |                |                |                |                |               |               |               |
| Dementia       | 23.4%<br>(15)                                            | 32.3%<br>(10)  | 17.1%<br>(7)   | 25.0%<br>(5)   | 11.1%<br>(2)   | 13.9%<br>(5)  | 9.1%<br>(1)   | 5.9%<br>(1)   |
| No<br>Dementia | 76.6%<br>(49)                                            | 67.7%<br>(21)  | 82.9%<br>(34)  | 75.0%<br>(15)  | 88.9%<br>(16)  | 86.1%<br>(31) | 90.9%<br>(10) | 94.1%<br>(16) |
|                | Age ≥ 47 – 53 years; N=590; AUC = 0.699 (0.632 - 0.767)  |                |                |                |                |               |               |               |
| Dementia       | 22.4%<br>(28)                                            | 10.3%<br>(10)  | 8.2%<br>(9)    | 7.0%<br>(6)    | 2.5%<br>(1)    | 6.0%<br>(4)   | 5.9%<br>(1)   | 0%<br>(0)     |
| No<br>Dementia | 77.6%<br>(97)                                            | 89.7%<br>(87)  | 91.8%<br>(101) | 93.0%<br>(80)  | 97.5%<br>(39)  | 94.0%<br>(63) | 94.1%<br>(16) | 100%<br>(48)  |
|                | Age ≥ 40 – 46 years; N=1047; AUC = 0.704 (0.643 - 0.766) |                |                |                |                |               |               |               |
| Dementia       | 14.6%<br>(21)                                            | 8.3%<br>(10)   | 5.8%<br>(11)   | 6.3%<br>(11)   | 3.1%<br>(4)    | 2%<br>(3)     | 1.5%<br>(1)   | 0%<br>(0)     |
| No<br>Dementia | 85.4%<br>(123)                                           | 91.7%<br>(110) | 94.2%<br>(178) | 93.7%<br>(164) | 96.9%<br>(124) | 98%<br>(147)  | 98.5%<br>(65) | 100%<br>(75)  |
|                | Age < 40 years; N= 341 AUC = 0.818 (0.724 - 0.912)       |                |                |                |                |               |               |               |
| Dementia       | 11.1%<br>(4)                                             | 14.6%<br>(6)   | 2.8%<br>(2)    | 0%<br>(0)      | 2.5%<br>(1)    | 0%<br>(0)     | 0%<br>(0)     | 0%<br>(0)     |
| No<br>Dementia | 88.9%<br>(32)                                            | 85.4%<br>(35)  | 97.2%<br>(70)  | 100%<br>(56)   | 97.5%<br>(39)  | 100%<br>(49)  | 100%<br>(15)  | 100%<br>(32)  |

Note. Cases with dementia were categorized as demented according to both TELE and TICS instruments; all others are considered as non-demented. TELE = a telephone assessment for dementia, TICS = Telephone Interview for Cognitive Status.

Supplementary Table 6. Linear regression models with cognitive reserve (CR) score (without age), cardiovascular disease status, ApoE genotype and family income.

|                                         | Model 1           | Model 2            | Model 3            | Model 4            | Model 5           |
|-----------------------------------------|-------------------|--------------------|--------------------|--------------------|-------------------|
| N                                       | 2284              | 2284               | 1671               | 1671               | 2158              |
| CR score                                | 1.056<br>p <0.001 | 1.047<br>p <0.001  | 0.967<br>p <0.001  | 0.957<br>p <0.001  | 0.963<br>p <0.001 |
| Cardiovascular disease                  | -                 | -0.573<br>p =0.038 | -                  | -0.619<br>p =0.037 | -                 |
| ApoE ( $\epsilon$ 4+ vs. $\epsilon$ 4-) | -                 | -                  | -0.517<br>p =0.061 | -0.505<br>p =0.067 | -                 |
| Family income                           | -                 | -                  | -                  | -                  | 0.154<br>p =0.077 |

Note. Dependent variable is total TELE/TICS score. All models include sex, age and follow-up time as covariates. TELE = a telephone assessment for dementia, TICS = Telephone Interview for Cognitive Status.
